# Supplementary material
Source: MDPI journal article supplement (https://www.mdpi.com/2227-7102/11/7/346)
Supplement: s1 [file s1]

Supporting information

## Project-based Teaching in Organic Chemistry through Blended Learning Model to Develop Self- study Capacity of High School Students in Vietnam

**Table S1.** Criteria and level of assessment of students' self-study competency in project teaching according to the blended learning model.

| Tiêu chí                                                               | Level                                                                                                                                         |                                                                                                            |                                                                                                                                                   |
|------------------------------------------------------------------------|-----------------------------------------------------------------------------------------------------------------------------------------------|------------------------------------------------------------------------------------------------------------|---------------------------------------------------------------------------------------------------------------------------------------------------|
|                                                                        | Level 1<br>(1,0 points)                                                                                                                       | Level 2<br>(2,0 points)                                                                                    | Level 3<br>(3,0 points)                                                                                                                           |
| 1. Setting learning goals                                              | The student set goals and identified research problems for the project, but these goals and research problems were not reasonable and unclear | The students set goals and identified the project's problems logically, clearly but incompletely           | The students set goals and identified the project's problems logically, clearly, and completely                                                   |
| 2. Identifying what is known to be relevant to the learning objective  | The student had not identified or clearly identified what is known to be relevant to the project                                              | The student clearly identified a part of things that were known to be relevant to the project              | The students clearly and fully identified what is known related to the project                                                                    |
| 3. Determining the means and ways of performing the learning tasks.    | The student identified the means and ways of performing the learning tasks but these means and ways were not suitable.                        | The student identified appropriate means and ways of performing certain tasks.                             | The student identified appropriate means and ways of performing all tasks                                                                         |
| 4. Scheduling the implementation time and predicting achieved results. | The timetable was set up, but it was not clear or reasonable. The student had not yet predicted achieved results in the project.              | The student created a clear and reasonable timetable and predicted some of the project's results.          | The student created a clear, reasonable timetable or regularly adjusted to reasonable and predicted achieved results of all tasks in the project. |
| 5. Collecting information                                              | The student collected information for the project via the Internet and other sources, but this information was inaccurate or appropriate.     | The student collected information for the project via the Internet and other sources. This information was | The student collected information for the project via the Internet and other sources. This information was accurate, relevant, and complete       |

|                                                                   |                                                                                                                                                                                    |                                                                                                                                                                                             |                                                                                                                                                                                                              |
|-------------------------------------------------------------------|------------------------------------------------------------------------------------------------------------------------------------------------------------------------------------|---------------------------------------------------------------------------------------------------------------------------------------------------------------------------------------------|--------------------------------------------------------------------------------------------------------------------------------------------------------------------------------------------------------------|
|                                                                   |                                                                                                                                                                                    | accurate, relevant but incomplete.                                                                                                                                                          |                                                                                                                                                                                                              |
| 6. Processing received information and solving learning problems. | The student did not know how to process received information or process it, but not accurate. The student has not yet concluded the problem of the project.                        | The student processed some information accurately and scientifically. The student drew appropriate but incomplete conclusions for the project's problems.                                   | The student processed some information accurately and scientifically. The student drew completely appropriate conclusions for the project's problems                                                         |
| 7. Cooperating with teachers and other classmates.                | The student was not active, did not often cooperate with teachers and classmates to support or seek support.                                                                       | The student actively cooperated with teachers and classmates to support/seek support, but it was not very effective.                                                                        | The student actively cooperated with teachers and classmates to effectively support/seek support.                                                                                                            |
| 8. Presenting and defending learning outcomes.                    | The student presented the results of the project without logic and clarity. The student has not answered the questions or problems posed for the project.                          | The student presented project results logically, clearly but not creatively. The student could answer some questions or problems posed for the project.                                     | The student presented products logically, clearly, and creatively. The student thoroughly answered the questions or problems posed for the project.                                                          |
| 9. Assessing learning outcomes.                                   | The student assessed the obtained results from the project but not objectively, precisely. The student had not shown evidence to demonstrate the level of achievement of the goal. | The student assessed the obtained results from the project objectively, precisely. The student pointed out some evidence that proves the level of achievement but was not very appropriate. | The student objectively and accurately evaluated the obtained results from the project. The student could show enough appropriate evidence to demonstrate the level of achievement, build a project profile. |
| 10. Learning from experience and adjusting                        | The student mentioned some limitations and errors, but the student had not found solutions to overcome                                                                             | The student mentioned most of the limitations and errors. The student found a solution, but it was not suitable.                                                                            | The student fully stated the limitations and errors; the student found appropriate measures to overcome those limitations and errors.                                                                        |

**Table S2.** KWL diagram of a student participating in the experiment.

| Project title: Great use of vinegar.                                                                                                                                                                                                                                        |                                                                                                                                                                                                                                                                                                                                                                                                                                                                                                                                                  |                                               |
|-----------------------------------------------------------------------------------------------------------------------------------------------------------------------------------------------------------------------------------------------------------------------------|--------------------------------------------------------------------------------------------------------------------------------------------------------------------------------------------------------------------------------------------------------------------------------------------------------------------------------------------------------------------------------------------------------------------------------------------------------------------------------------------------------------------------------------------------|-----------------------------------------------|
| <b>K</b><br>What you already know related to the project topic                                                                                                                                                                                                              | <b>W</b><br>Problems to be solved of the selected project topic                                                                                                                                                                                                                                                                                                                                                                                                                                                                                  | <b>L</b><br>What you learn after the project) |
| <ul style="list-style-type: none"> <li>- Vinegar is used in the preparation of dishes and dipping sauces.</li> <li>- Vinegar contains acetic acid.</li> <li>- Vinegar is a white, sour taste.</li> <li>- Vinegar is made from the fermentation of ethyl alcohol.</li> </ul> | <ul style="list-style-type: none"> <li>- What is the composition of vinegar? What gives vinegar the sour taste?</li> <li>- What uses does vinegar have in food, and what benefits does it bring to human health?</li> <li>- What are the ingredients and the process of making vinegar according to the traditional method?</li> <li>- What is fake vinegar? What harm does using fake vinegar cause to human health? How to distinguish between rice vinegar and fake vinegar?</li> <li>- What other uses does vinegar have in life?</li> </ul> |                                               |
| What did you do well in the project? What did you do not doing well? How to fix it?.....                                                                                                                                                                                    |                                                                                                                                                                                                                                                                                                                                                                                                                                                                                                                                                  |                                               |

**Table S3.** Project implementation plan of a group of students participating in the experiment.

| Group 1- topic: Making yogurt at home.                                                                             |                                                          |                                                                                                                      |              |                           |                    |
|--------------------------------------------------------------------------------------------------------------------|----------------------------------------------------------|----------------------------------------------------------------------------------------------------------------------|--------------|---------------------------|--------------------|
| <b>Objective:</b> Make yogurt at home and introduce the product in front of the class.                             |                                                          |                                                                                                                      |              |                           |                    |
| <b>Problems to be solved:</b> 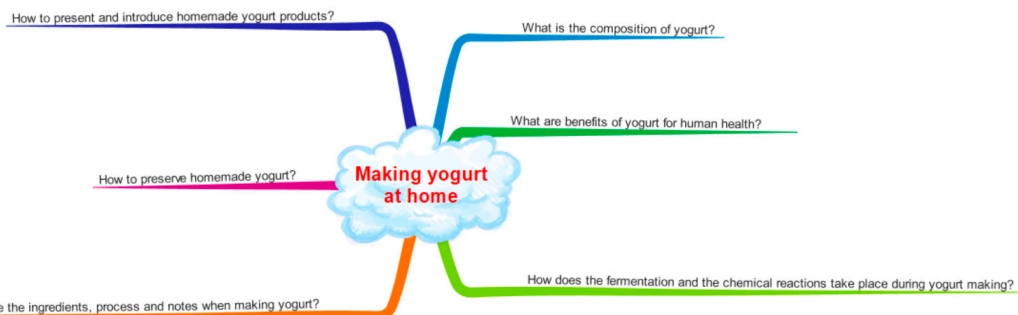 |                                                          |                                                                                                                      |              |                           |                    |
| TT                                                                                                                 | Task                                                     | Means and how to proceed                                                                                             | Time         | Expected products         | Performer          |
| 1                                                                                                                  | Study the nutrition compositions and benefits of yogurt. | Find information in books and the Internet, save the search address. Find information from marketed yogurt products. | 12-15/5/2020 | - Text and illustrations. | Thanh Dat, Anh Hao |

|   |                                                                                                   |                                                                      |                               |                           |                      |
|---|---------------------------------------------------------------------------------------------------|----------------------------------------------------------------------|-------------------------------|---------------------------|----------------------|
| 2 | Study about the fermentation mechanism and the chemical reactions that occur in the yogurt making | Find information in books and the Internet, save the search address. | 12-15/5/2020                  | - Texts and illustrations | Tung Lam, Nhat Anh   |
| 3 | Study the ingredients, process, and notes when making yogurt.                                     | Find information in books and the Internet, save the search address. | 12-15/5/2020                  | - Texts and illustrations | Ngoc Sang, My Phuong |
| 4 | Learn how to preserve homemade yogurt.                                                            | Find information in books and the Internet, save the search address. | 12-15/5/2020                  | - Texts and illustrations | Huu Loc, Minh Tam    |
| 5 | Making yogurt at home                                                                             | Prepare ingredients, tools and proceed to make yogurt.               | 17/5/2020 at Ngoc Sang's home | - Yoghurt                 | Group                |
| 6 | Prepare a presentation of homemade yogurt products.                                               | Laptop, papers, pens.                                                | 17/5/2020 at Ngoc Sang's home | - Plan (3-5 phút).        | Group                |

Table S4. Criteria for evaluating project products.

| Evaluation Criteria                                          | Levels of evaluation criteria                                                                                              |                                                                                                                                       |                                                                                                                          | Points achieved |
|--------------------------------------------------------------|----------------------------------------------------------------------------------------------------------------------------|---------------------------------------------------------------------------------------------------------------------------------------|--------------------------------------------------------------------------------------------------------------------------|-----------------|
|                                                              | Level 1<br>(1,0 points)                                                                                                    | Level 2<br>(2,0 points)                                                                                                               | Level 3<br>(3,0 points)                                                                                                  |                 |
| 1. Scientific content                                        |                                                                                                                            |                                                                                                                                       |                                                                                                                          |                 |
| 1. Project goals and problems to be solved                   | Shown not clearly and reasonably project's goals and problems to be solved.                                                | Shown clearly and reasonably goals and problems to be solved but not full                                                             | Shown clearly, reasonably, and fully the goals and problems to be solved.                                                |                 |
| 2. Collect information for the project.                      | Collect information that is not accurate, not relevant for the problem to be solved. There is not a clear source citation. | Collect information that is accurate, relevant to the problem to be solved, but incomplete. There is a clear source citation.         | Collect information that is accurate, relevant and complete to solve project problems. There is a clear source citation. |                 |
| 3. Process information and draw conclusions for the project. | Unprocessed or incorrectly processed information, not draw logical conclusions to the project's problems.                  | Process accurately, scientifically some information; draw some reasonable conclusions to the project's problems but are not complete. | Process information accurately, scientifically, draw reasonable and complete conclusions for the project's problems.     |                 |
| 2. Present products                                          |                                                                                                                            |                                                                                                                                       |                                                                                                                          |                 |

|                                                      |                                                                                                                                                 |                                                                                                                 |                                                                                                            |  |
|------------------------------------------------------|-------------------------------------------------------------------------------------------------------------------------------------------------|-----------------------------------------------------------------------------------------------------------------|------------------------------------------------------------------------------------------------------------|--|
| 4. Layout                                            | The layout is not clear, not logical; the main content has not been clarified.                                                                  | The layout is clear and logical, but the main content is not highlighted                                        | The layout is clear, logical; the main content is prominent, easy to follow.                               |  |
| 5. The form and language used to present the product | The presentation is not beautiful; the colors are not harmonious, the illustrations are not suitable. The language is confusing and inaccurate. | Beautiful presentation, harmonious colors, appropriate illustrations. Expressive language is not very accurate. | Beautiful presentation, harmonious colors, suitable vivid images. The language is accurate and scientific. |  |
| 6. Product report                                    | The reported idea is familiar; the content is sketchy, the expression is not fluent.                                                            | New report ideas. Expression is relatively fluent, attractive to listeners.                                     | Unique, creative report ideas. Expressing fluently, confidently, creating excitement for listeners.        |  |
| 7. Collaboration in product reporting                | There is no coordination among team members when reporting products                                                                             | There is coordination among team members but not effective.                                                     | There is effective and close coordination among team members but not effective.                            |  |
| 8. Answer related questions                          | Answer incorrect questions related to the project.                                                                                              | Answer correctly and clearly to a few related questions.                                                        | Answer accurately, clearly, fully to all related questions.                                                |  |
